# Supplementary material for: Biomass Valorization: Sustainable Methods for the Production of Hemicellulolytic Catalysts from Thermoanaerobacterium thermostercoris strain BUFF
Source: MDPI journal article supplement (doi:10.3390/resources10110115), 2021-11-10
Supplement: s1 [file s1]

## Supplementary materials

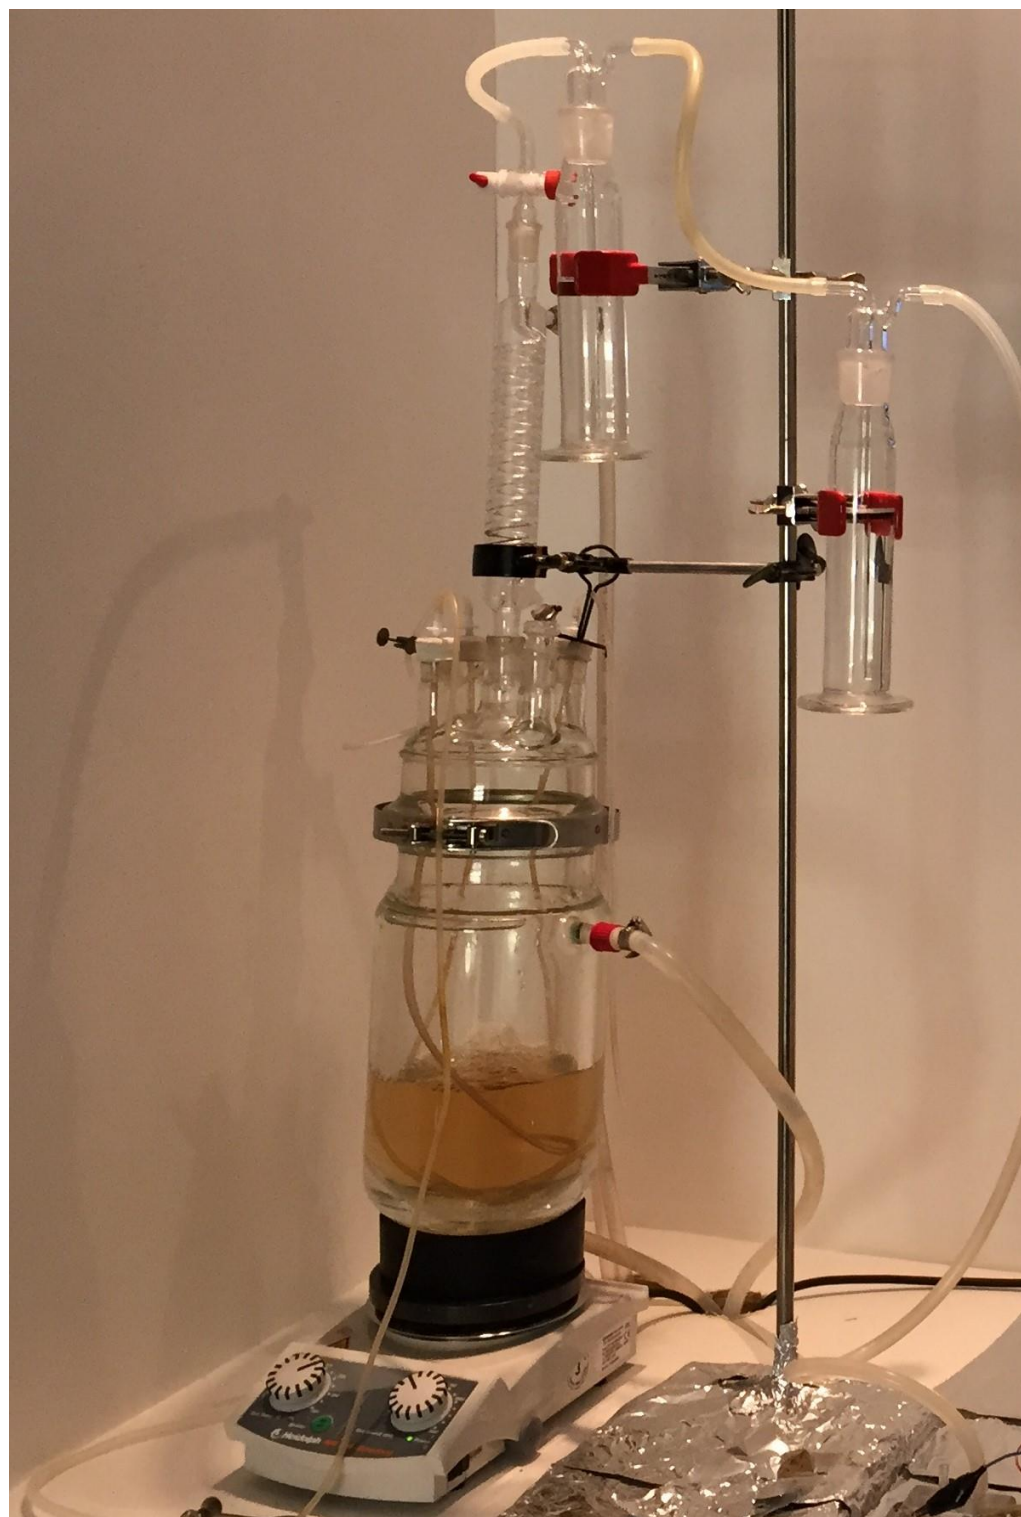

**Figure S1.** Glass fermenter connected to a thermostat water bath, a reflux condenser and to an exit system containing NaOH solution. Note that in order to purify H<sub>2</sub> from H<sub>2</sub>S, gas produced during fermentation process first passes through a flask containing NaOH solution (2M) and a second flask containing distilled water.

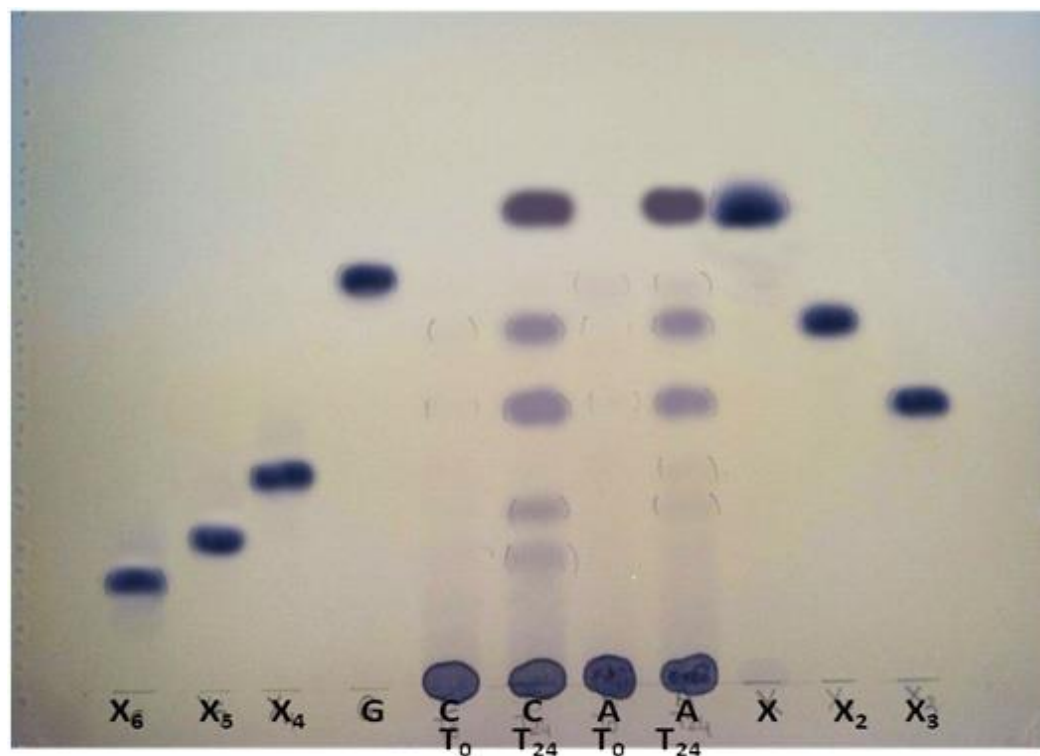

**Figure S2.** Thin layer chromatography analyses of hydrolysis products obtained by the enzymatic pool of the strain BUFF after 24 h of incubation at 60 °C on the hemicellulosic fractions recovered from *Cynara cardunculus* and *Arundo donax* biomass. X: xylose standard; X<sub>2</sub>: xylobiose standard; X<sub>3</sub>: xylotriose standard; X<sub>4</sub>: xylotetraose standard; X<sub>5</sub>: xylopentose standard; X<sub>6</sub>: xylohexose standard; G: glucose standard; C T<sub>0</sub>: reaction mixture containing the hemicellulosic fraction of *C. cardunculus* at zero incubation time; C T<sub>24</sub>: reaction mixture containing the hemicellulosic fraction of *C. cardunculus* after 24 h of incubation; A T<sub>0</sub>: reaction mixture containing the hemicellulosic fraction of *A. donax* at zero incubation time; A T<sub>24</sub>: reaction mixture containing the hemicellulosic fraction of *A. donax* after 24 h of incubation. Symbols delimiting the bands are visible.
